# Supplementary material
Source: bioRxiv or medRxiv preprint supplement (http://biorxiv.org/highwire/filestream/22135/field_highwire_adjunct_files/2/070037-3.pdf)
Supplement: Supplementary file [file 070037-3.pdf]

0 -log<sub>10</sub>(pvalue) 10

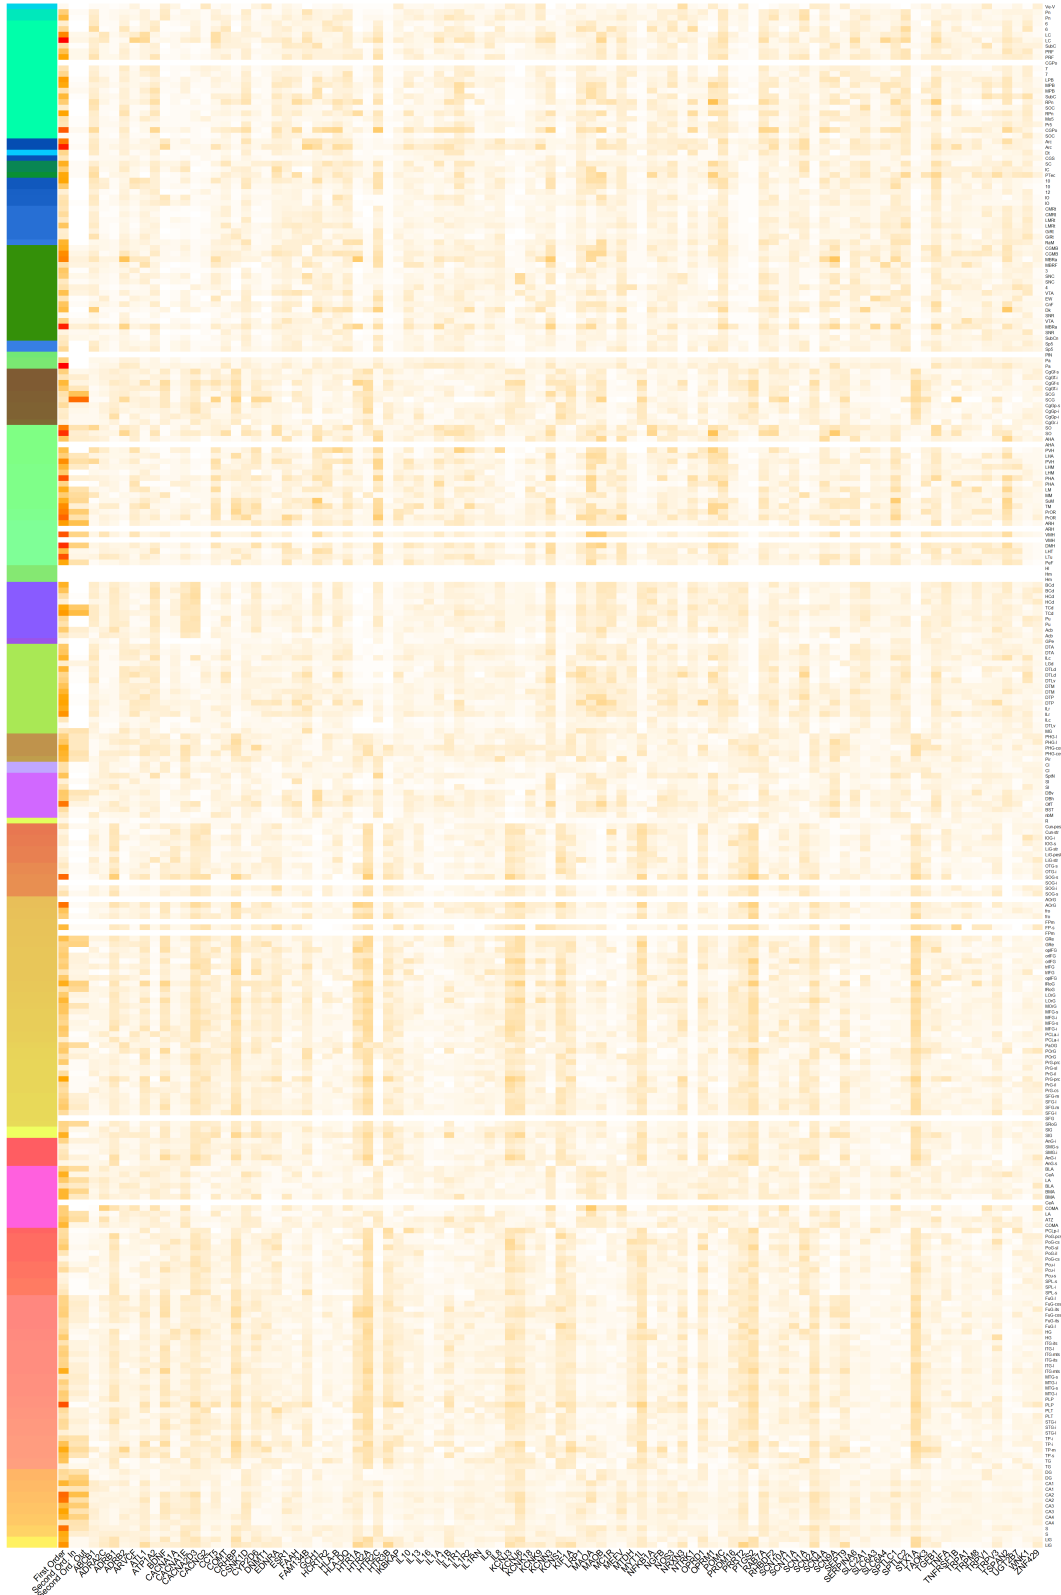

A

Supplementary Data 4 Case 2. Pain related genes in human gene-set of pain-QTLs. Heatmap of average log-scaled p-values of first and second order effects as well as single gene effects.





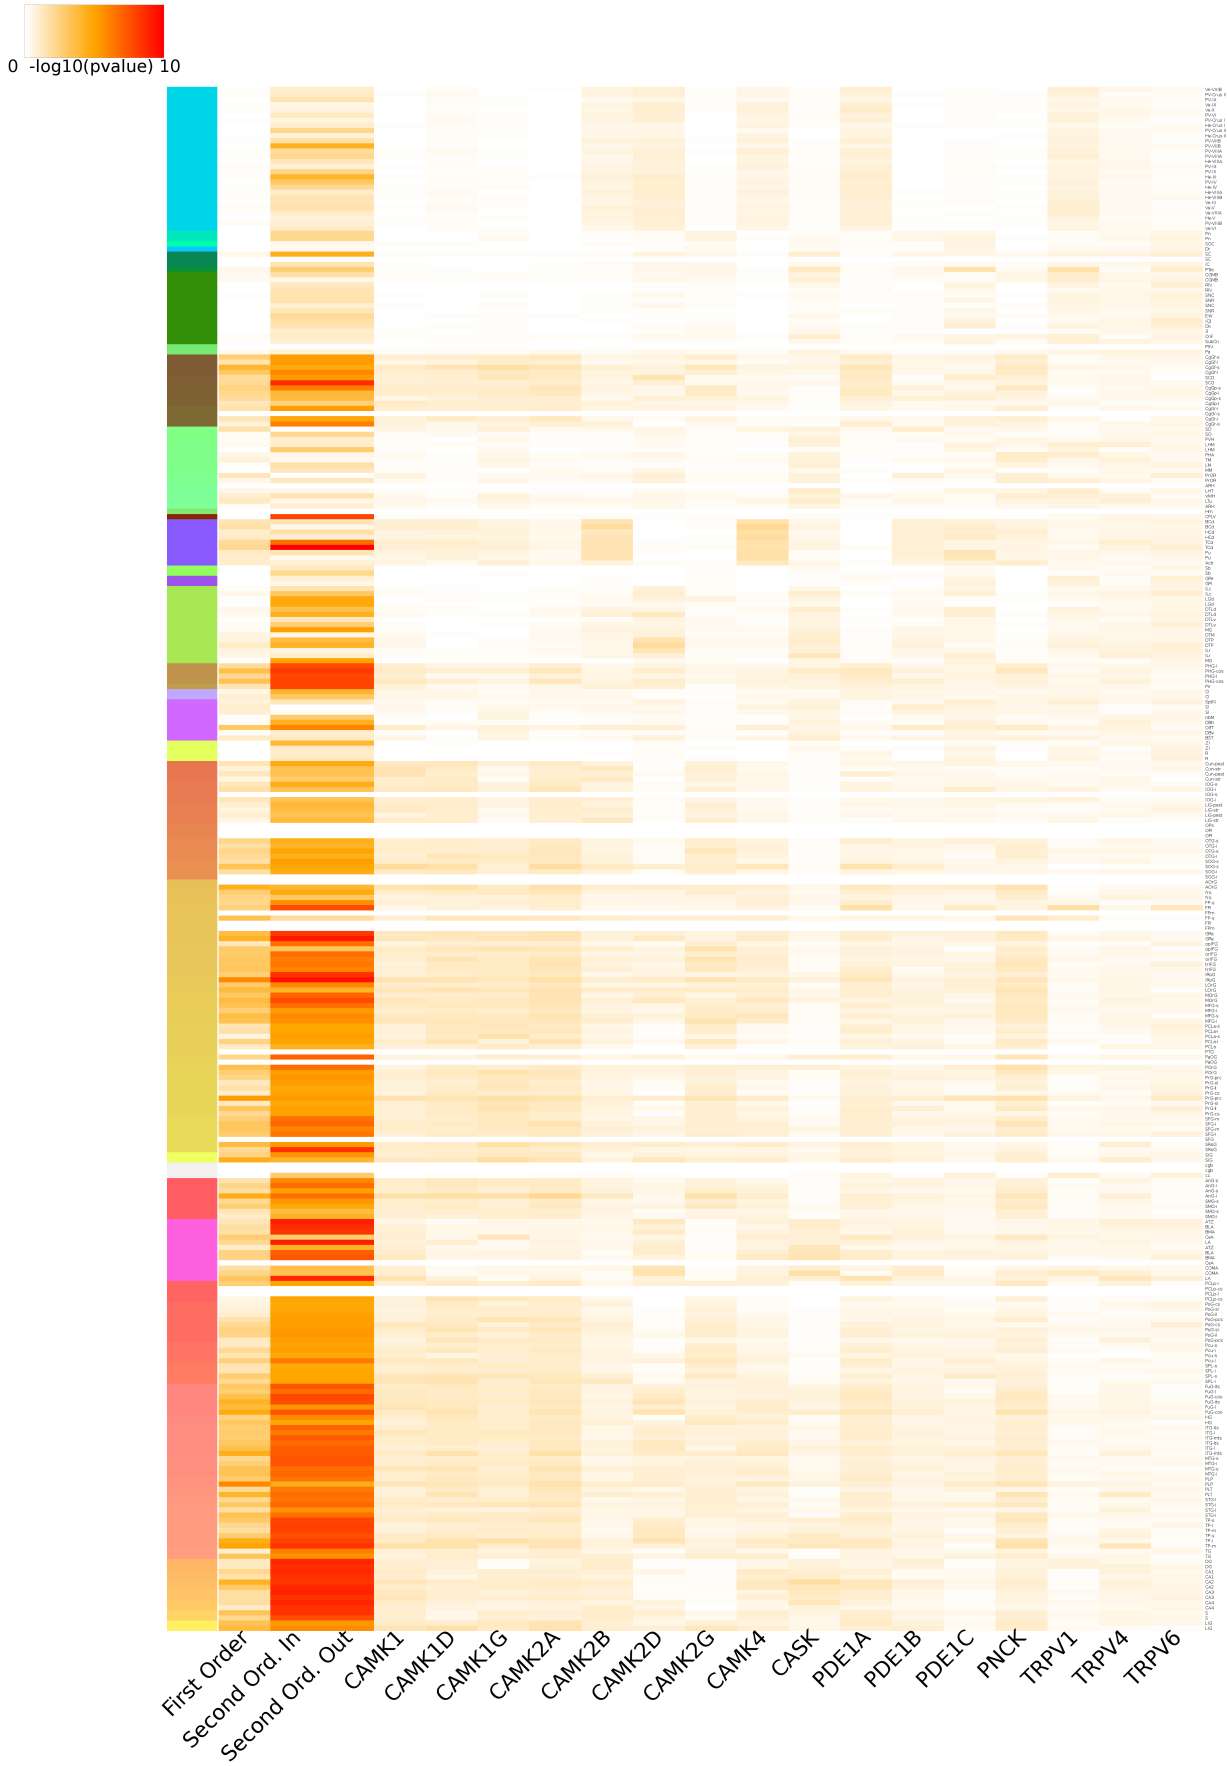

A

**Supplementary Data 4 Case 5. Calmodulin binding gene-set of pain-QTLs.** Heatmap of average log-scaled p-values of first and second order effects as well as single gene effects.





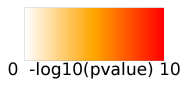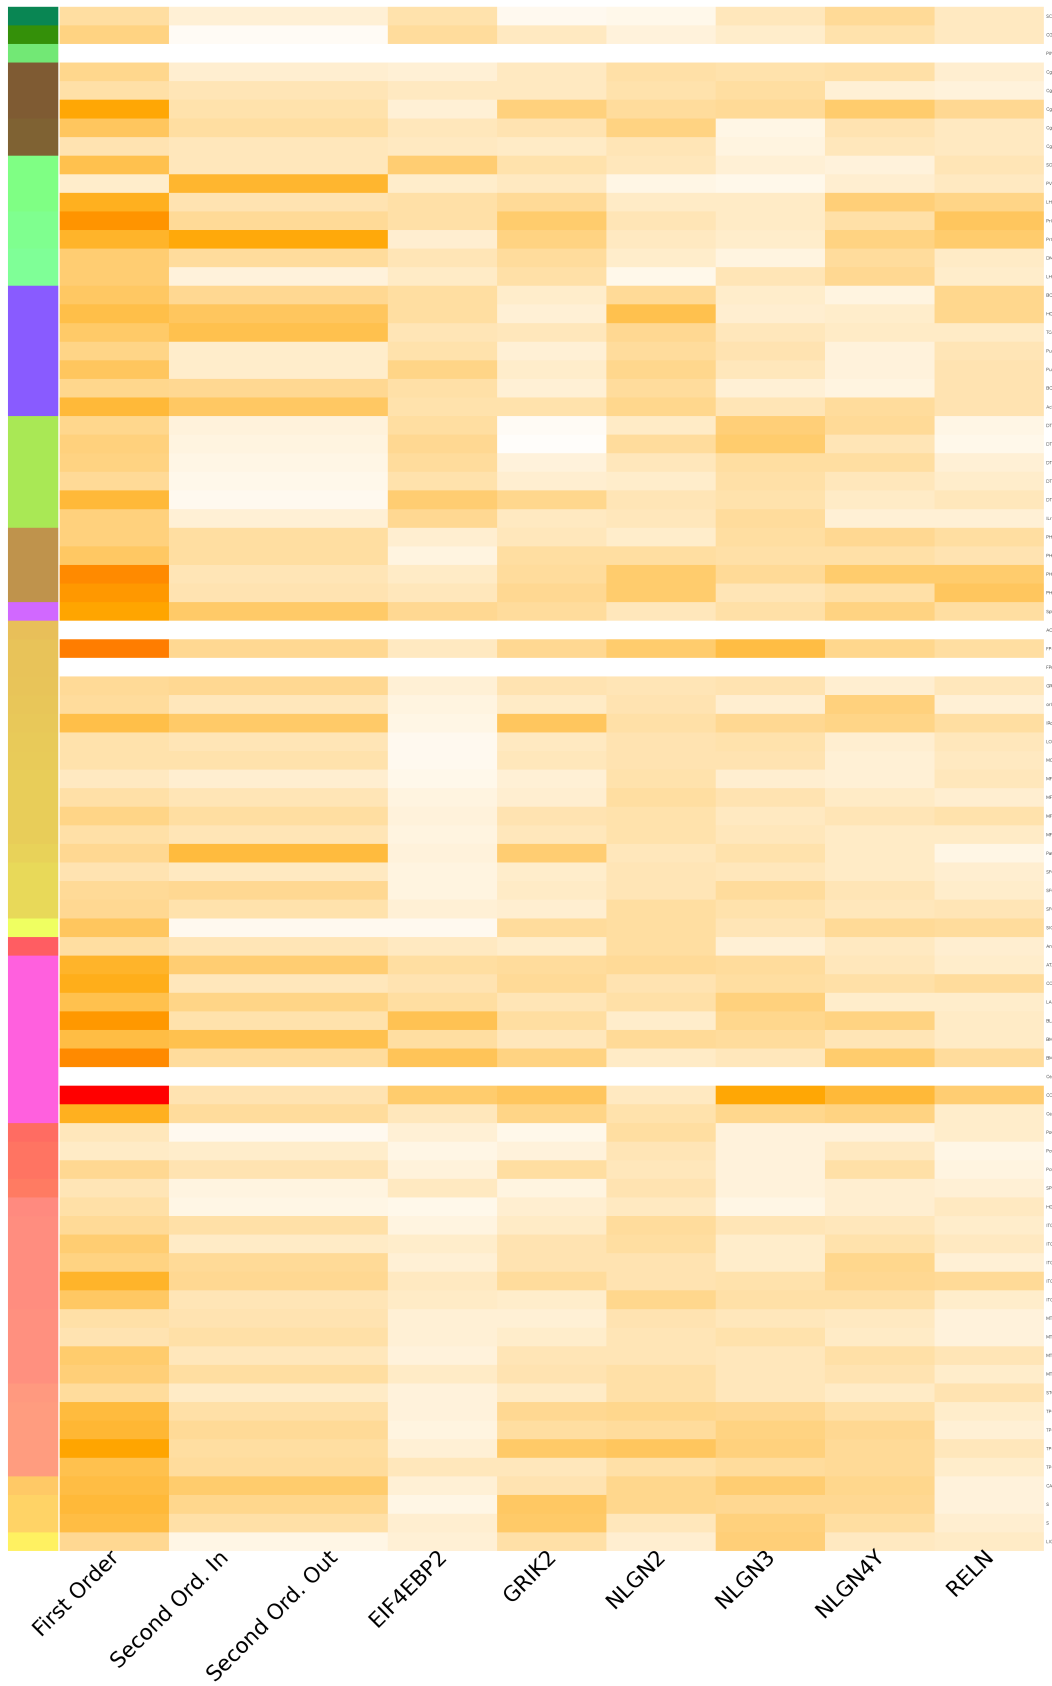

A

**Supplementary Data 4 Case 8. Autdb Human Modulation of synaptic transmission BP gene-set of autism-QTLs.** Heatmap of average log-scaled p-values of first and second order effects as well as single gene effects.



0 -log<sub>10</sub>(pvalue) 10

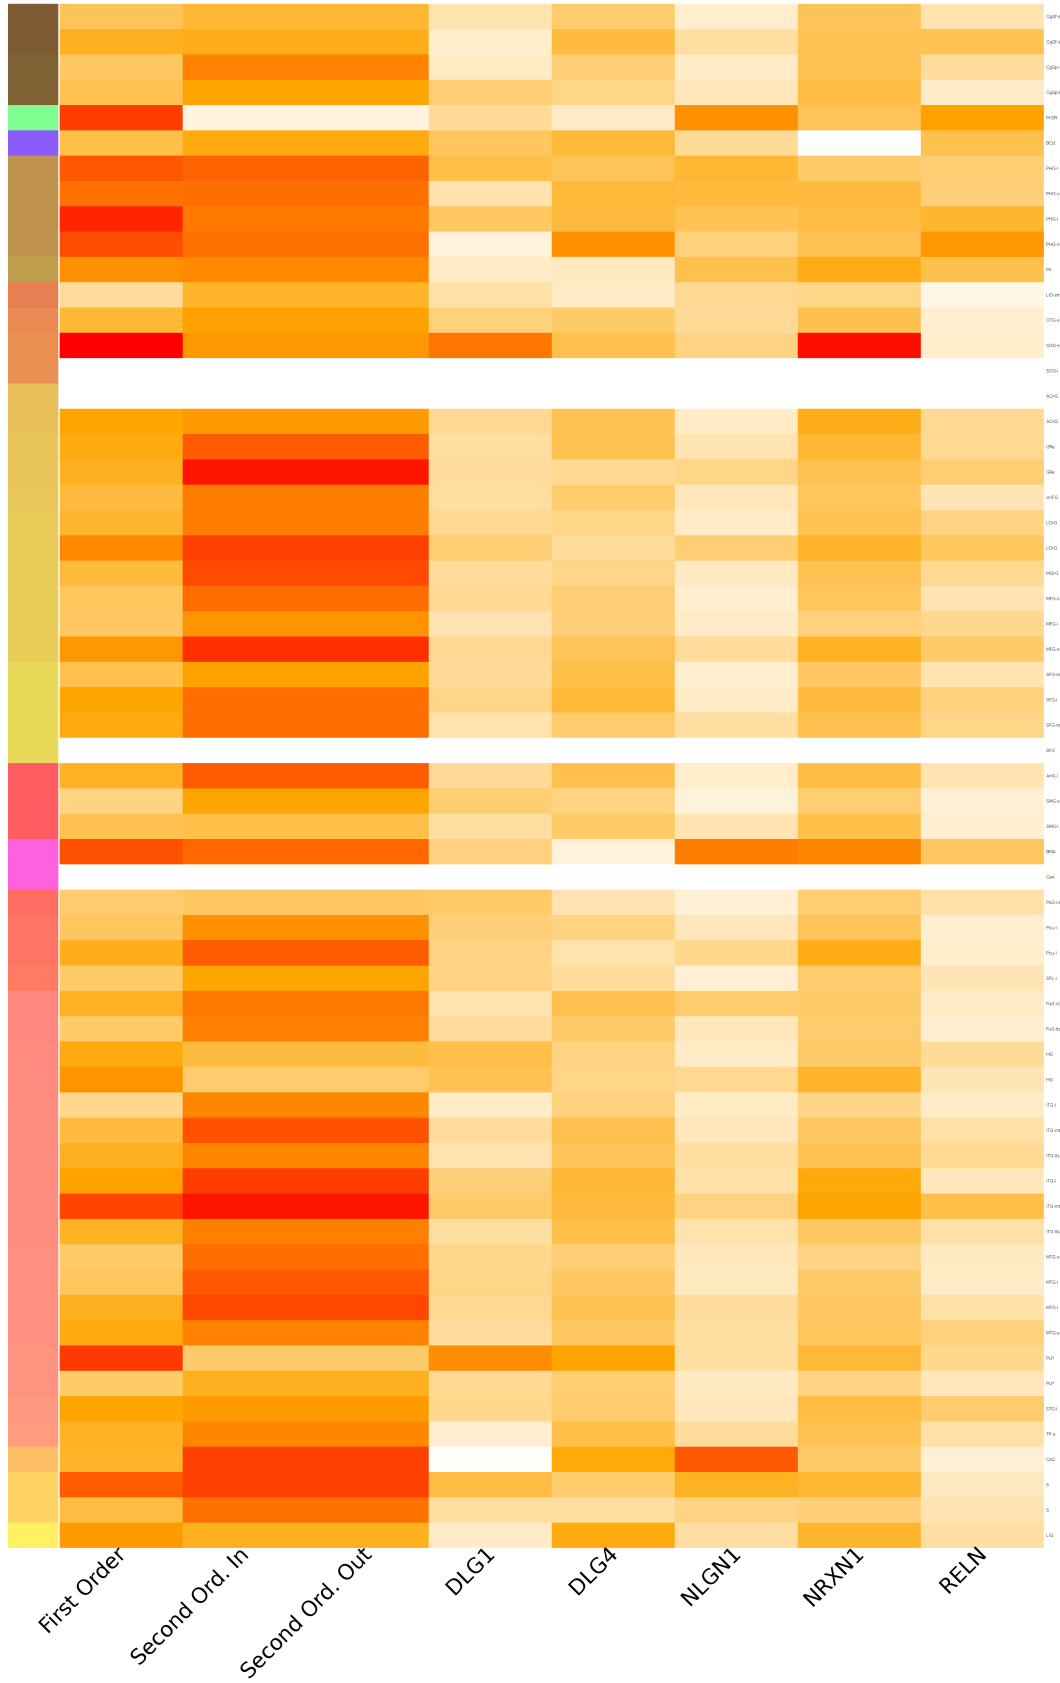

A

**Supplementary Data 4 Case 9. Autdb Human Receptor localization to synapse BP gene-set of autism-QTLs.** Heatmap of average log-scaled p-values of first and second order effects as well as single gene effects.







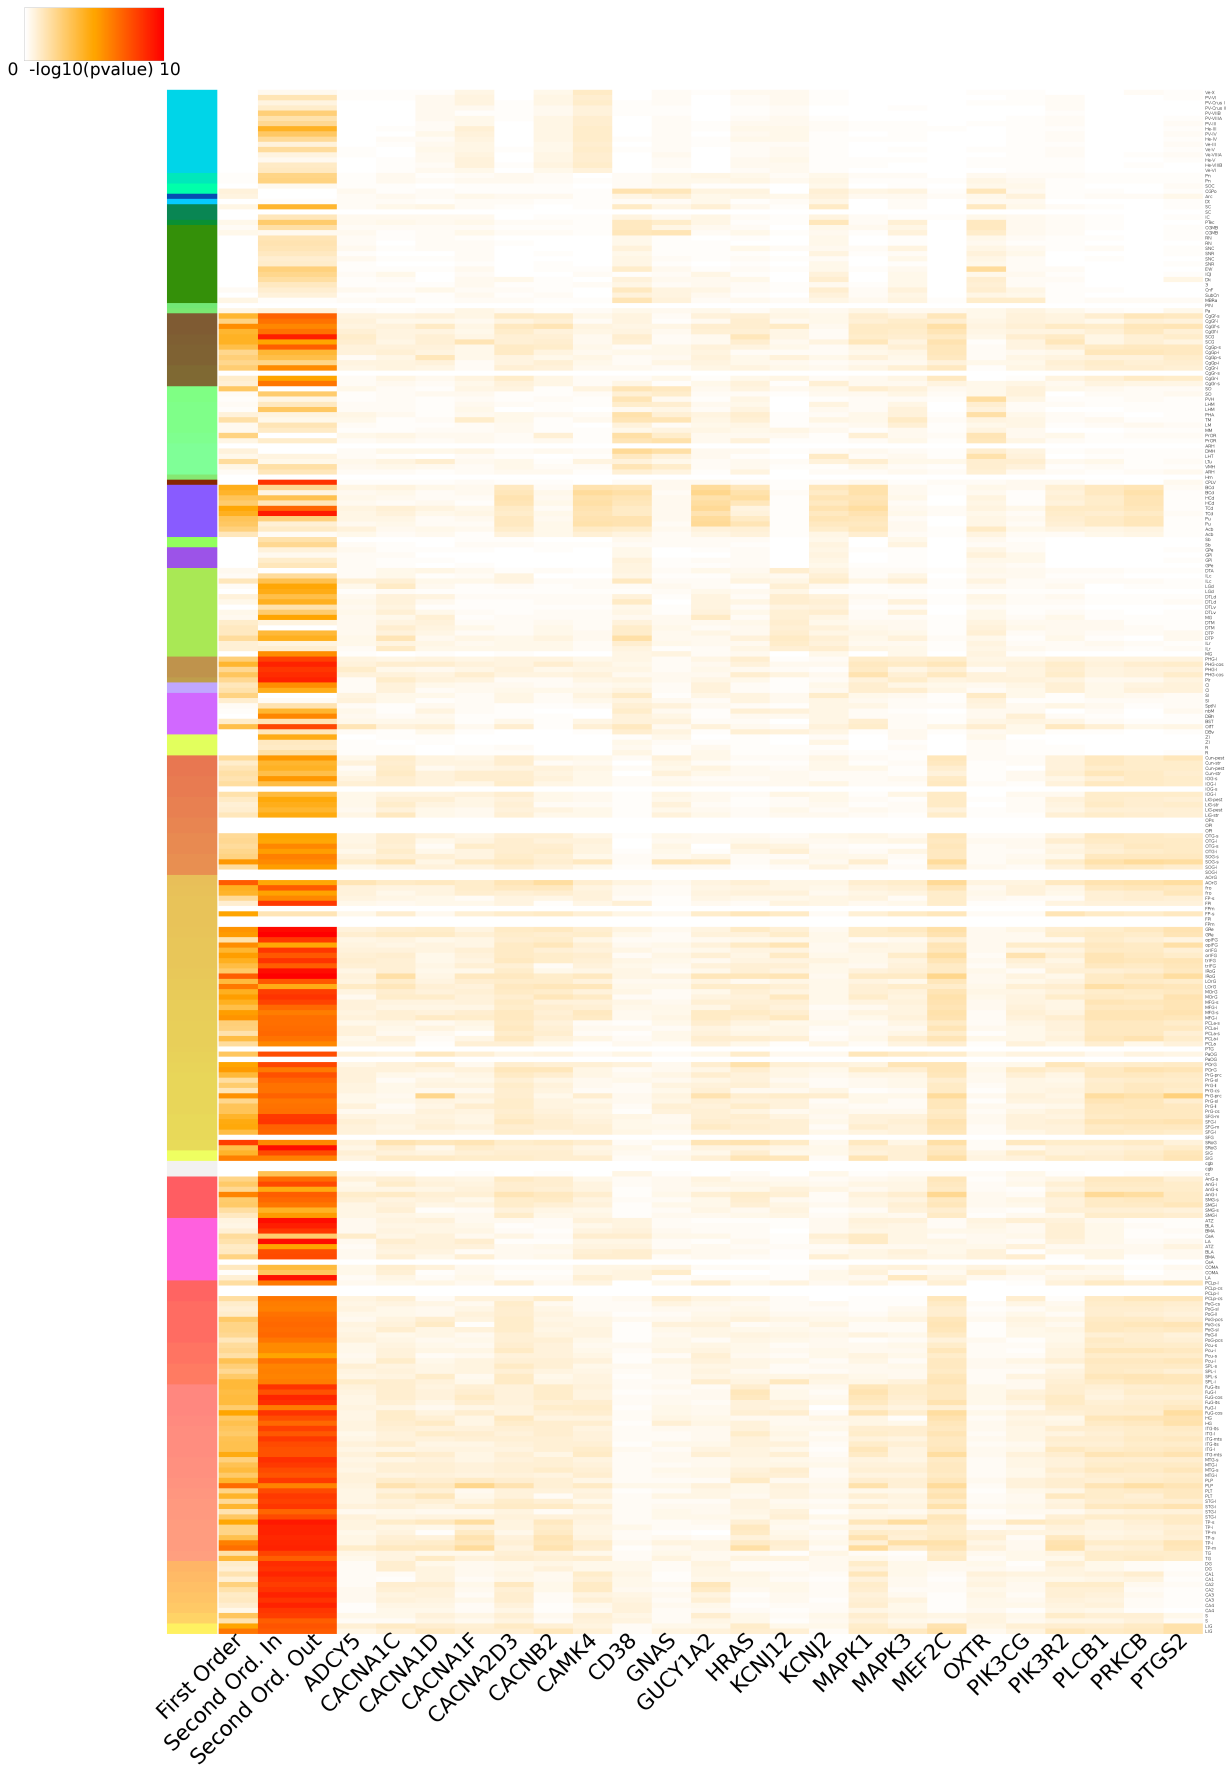

A

**Supplementary Data 4 Case 13. Autdb Human Oxytocin signaling pathway KEGG gene-set of autism-QTLs.** Heatmap of average log-scaled p-values of first and second order effects as well as single gene effects.

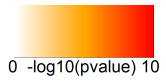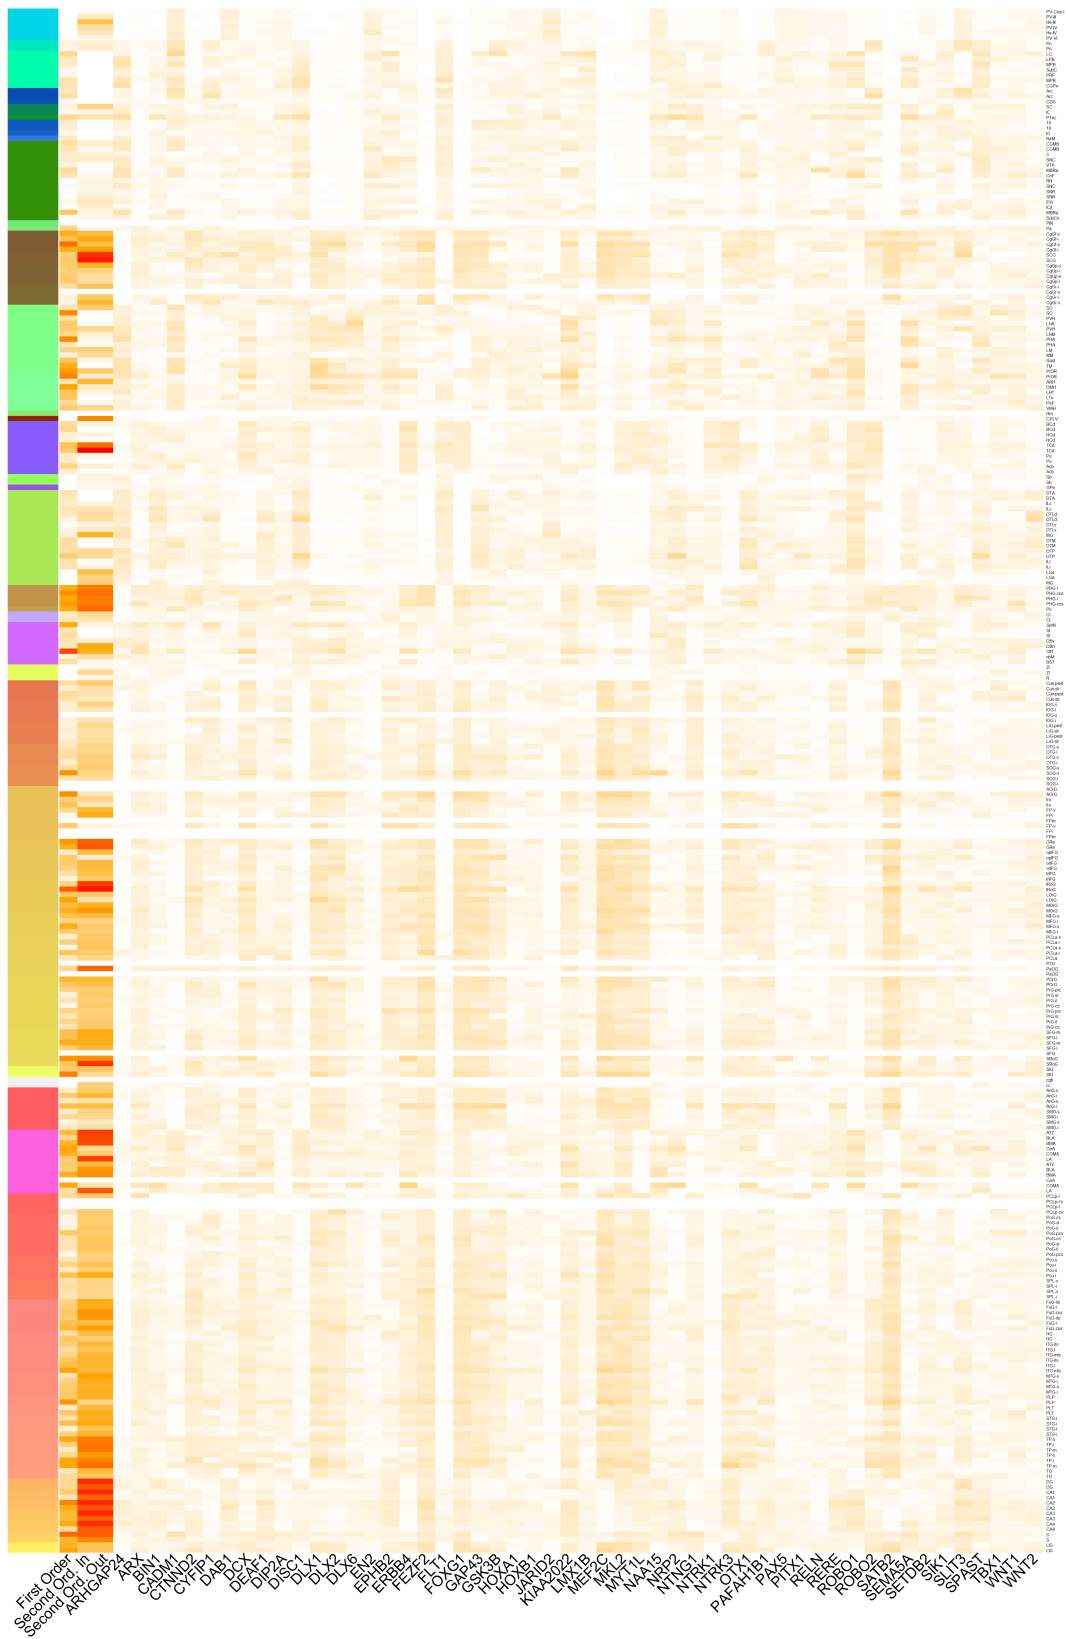

A

Supplementary Data 4 Case 14. Autdb Human Developmental protein keywords gene-set of autism-QTLs. Heatmap of average log-scaled p-values of first and second order effects as well as single gene effects.

0 -log<sub>10</sub>(pvalue) 10

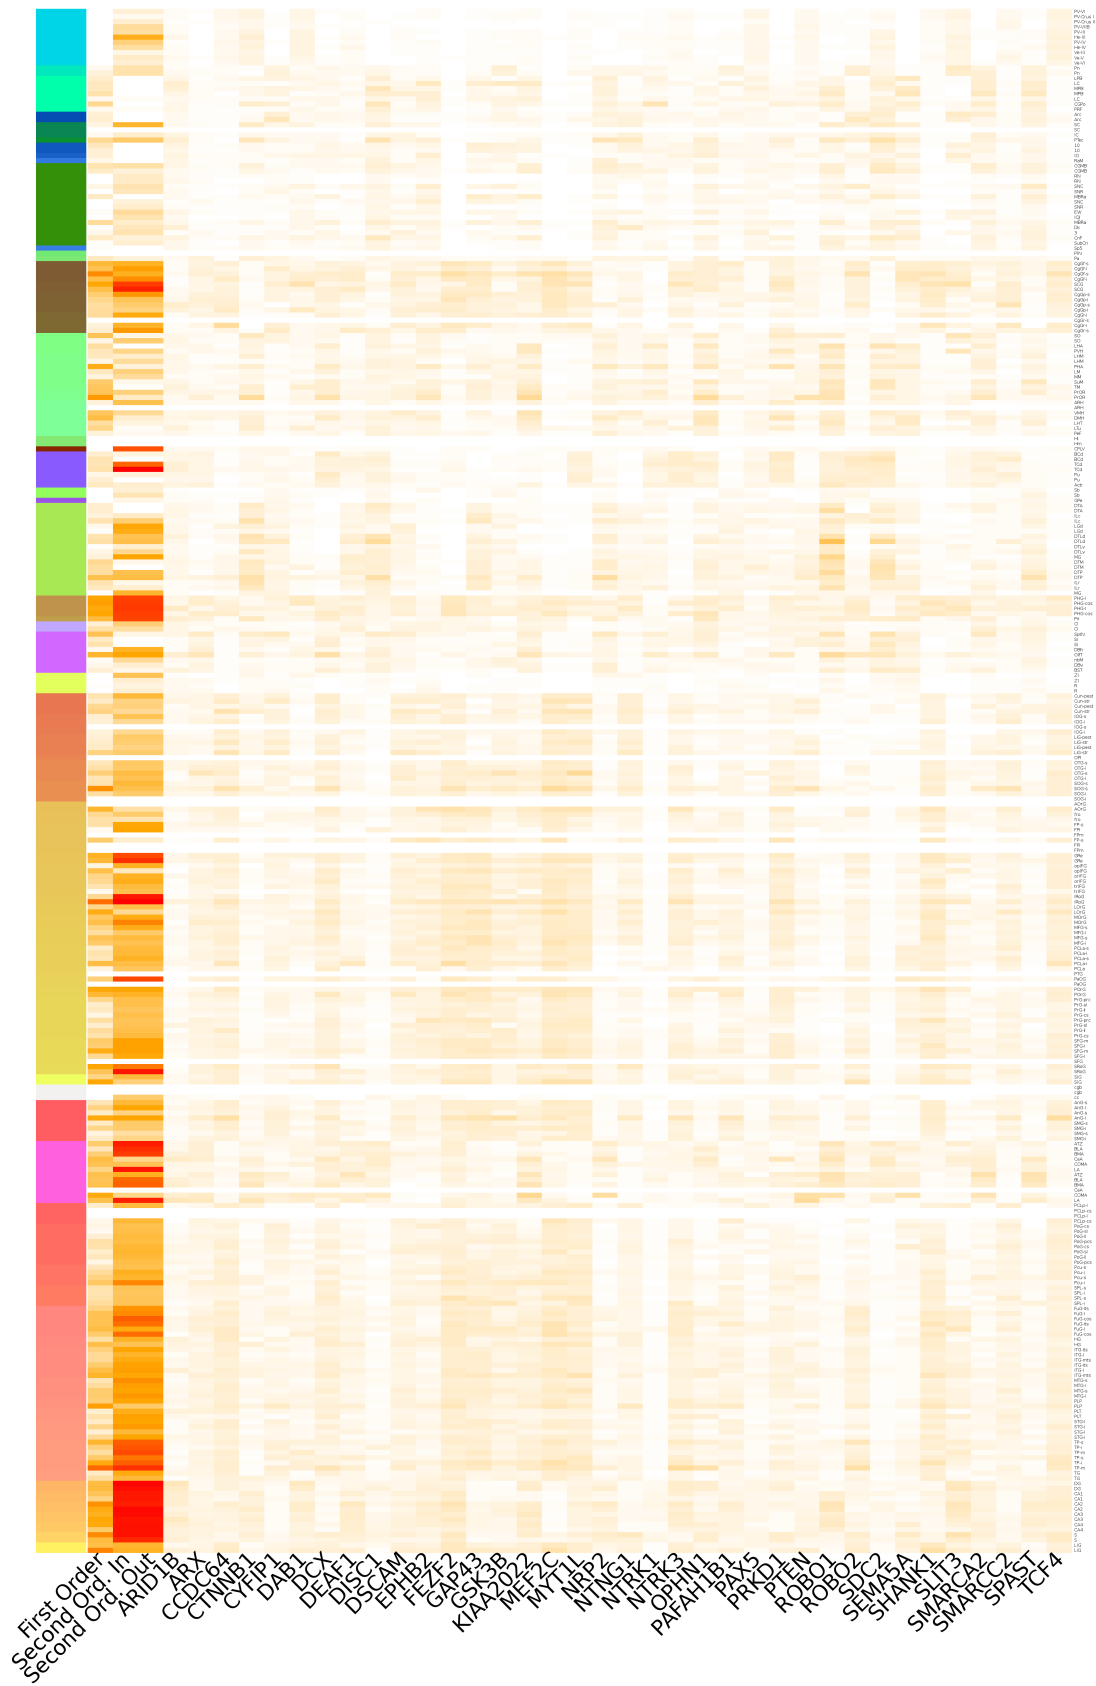

A

Supplementary Data 4 Case 15. Autdb Human Neurogenesis keywords gene-set of autism-QTLs. Heatmap of average log-scaled p-values of first and second order effects as well as single gene effects.





0 -log<sub>10</sub>(pvalue) 10

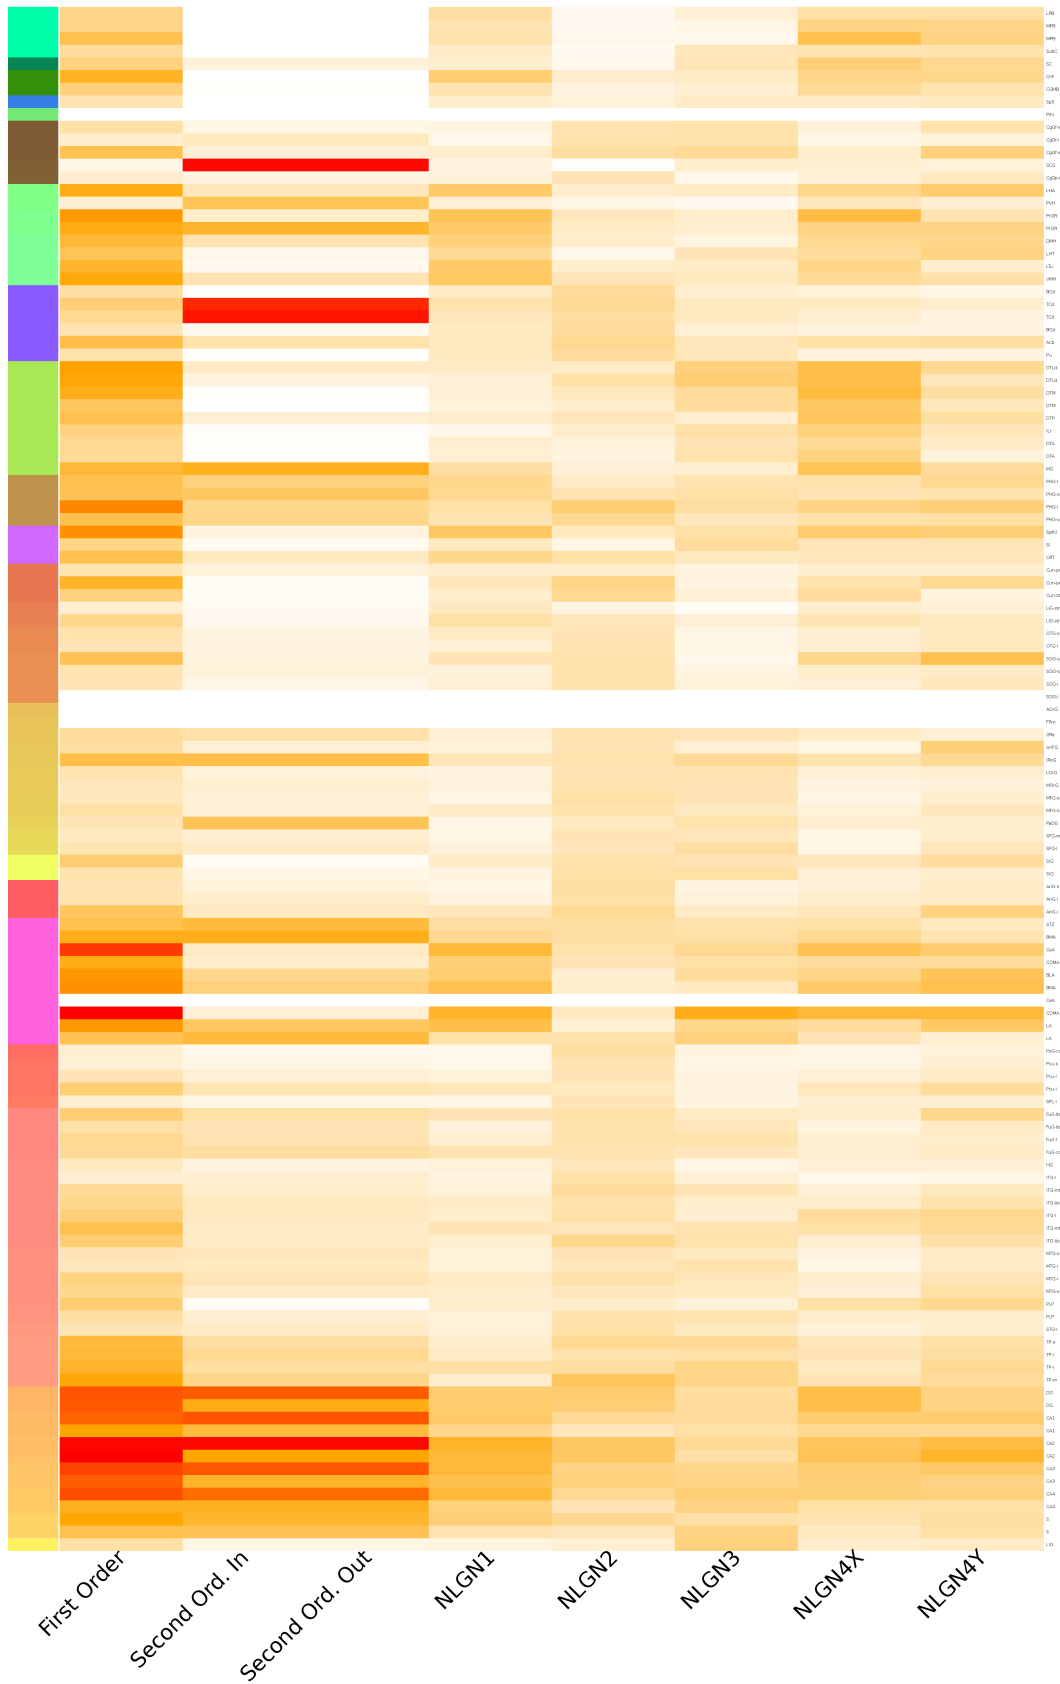

A

Supplementary Data 4 Case 17. Autdb Human Neuroligin INTERPRO gene-set of autism-QTLs. Heatmap of average log-scaled p-values of first and second order effects as well as single gene effects.
